# Supplementary material for: Stigma as a key determinant of health-related quality of life in Parkinson’s disease
Source: Springer Nature journal article supplement (doi:10.1007/s11136-016-1329-z), 2016-06-03
Supplement: MOESM1 [file 10683024]

Supplementary Material – Correlation and Regression Analyses

**Stigma as a key determinant of health-related quality of life in Parkinson’s disease**

**Journal: Quality of Life Research**

Hui-Ing Ma, Marie Saint-Hilaire, Cathi A Thomas, Linda Tickle-Degnen

Corresponding author: Hui-Ing Ma, Department of Occupational Therapy, College of Medicine, National Cheng Kung University, Tainan, Taiwan

huingma@mail.ncku.edu.tw

Table A. Pearson’s correlation coefficients (*r*) between stigma and PDQ-39 domains

|  | PDQ-39  Stigma domain | SSCI  Overall stigma | SSCI  Felt stigma | SSCI  Enacted stigma |
| --- | --- | --- | --- | --- |
| Mobility | .419* | .583* | .557* | .527* |
| ADL | .543* | .672* | .661* | .576* |
| Emotional wellbeing | .628* | .667* | .711* | .480* |
| Social support | .390* | .416* | .402* | .369* |
| Cognition | .464* | .499* | .497* | .417* |
| Communication | .638* | .672* | .641* | .611* |
| Bodily discomfort | .363* | .402* | .367* | .390* |
| SI | .785* | .833* | .820* | .714* |

** p* < 0.05

Table B. Pearson’s correlation coefficients (*r*) between control variables, stigma, and PDQ-39 with and without stigma domain

|  | Gender | H&Y | GDS | UPDRS  Part II | SSCI  Overall stigma | SSCI  Felt stigma | SSCI  Enact stigma |
| --- | --- | --- | --- | --- | --- | --- | --- |
| PDQ-SI | .258* | .382* | .647* | .712* | .833* | .820* | .714* |
| PDQ_no_stigma | .258* | .413* | .641* | .712* | .789* | .772* | .681* |

** p* < 0.05

Table C. Regression analysis of overall stigma as a predictor for PDQ-39 with and without the stigma domain

|  | Outcome variable | | | |
| --- | --- | --- | --- | --- |
|  | PDQ-SI | | PDQ_no_stigma | |
|  | △*R2* | β | △*R2* | β |
| Step 1 | .658* |  | .654* |  |
| Control variablesa |  |  |  |  |
| Step 2 | .137* |  | .096* |  |
| Overall stigma |  | .521* |  | .436* |
| Total adjusted *R2* | .778 |  | .730 |  |
| *F* | 48.79*** |  | 37.73*** |  |

a Control variables included gender, Hoehn & Yahr stage, depression, and motor difficulties of daily living

** p* < 0.05; *** *p* < 0.0001

Table D. Regression analysis of felt stigma as a predictor for PDQ-39 with and without the stigma domain

|  | Outcome variable | | | |
| --- | --- | --- | --- | --- |
|  | PDQ-SI | | PDQ_no_stigma | |
|  | △*R2* | β | △*R2* | β |
| Step 1 | .658* |  | .654* |  |
| Control variablesa |  |  |  |  |
| Step 2 | .137* |  | .096* |  |
| Felt stigma |  | .513* |  | .429* |
| Total adjusted *R2* | .779 |  | .729 |  |
| *F* | 48.83*** |  | 37.68*** |  |

a Control variables included gender, Hoehn & Yahr stage, depression, and motor difficulties of daily living

** p* < 0.05; ****p* < 0.0001

Table E. Regression analysis of enacted stigma as predictor for PDQ-39 with and without the stigma domain

|  | Outcome variable | | | |
| --- | --- | --- | --- | --- |
|  | PDQ-SI | | PDQ-SI_no stigma | |
|  | △*R2* | β | △*R2* | β |
| Step 1 | .658* |  | .654* |  |
| Control variables |  |  |  |  |
| Step 2 | .076* |  | .054* |  |
| Enacted stigma |  | .361* |  | .304* |
| Total adjusted *R2* | .713 |  | .684 |  |
| *F* | 34.76* |  | 30.46* |  |

aControl variables included gender, Hoehn & Yahr stage, depression, and motor difficulties of daily living.

* *p* < 0.05
